# Supplementary material for: Production of Poly(3-Hydroxybutyrate-Co-3-Hydroxyvalerate) by <em>Bacillus megaterium</em> LVN01 Using Biogas Digestate
Source: Preprints.org preprint supplement (doi:10.20944/preprints202403.1448.v1), 2024-03-25

**Figure S2.** Observation of stained spores from wild-type *Bacillus megaterium* samples grown on nutrient agar under stress conditions (44°C) at 100x magnification.


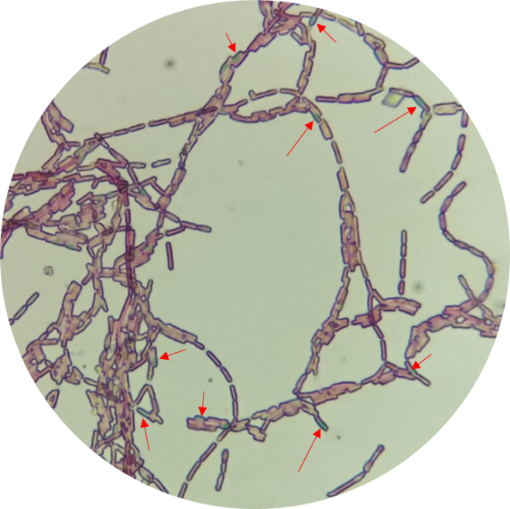

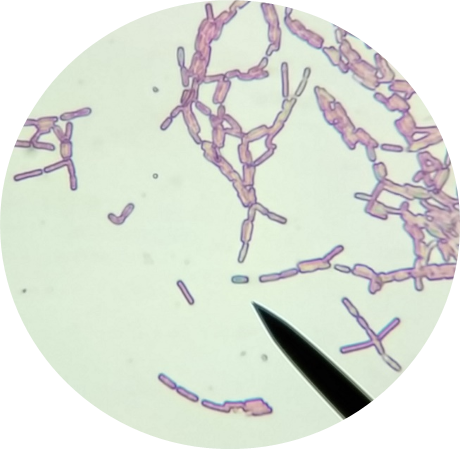

Supplement: Supplementary file 1 [file supplementary]
